# Supplementary material for: Impact of insufficient sleep on dysregulated blood glucose control under standardised meal conditions
Source: PubMed Central journal article supplement (PMC8741723; doi:10.1007/s00125-021-05608-y), 2021-11-30
Supplement: 125_2021_5608_MOESM1_ESM.pdf [file 125_2021_5608_MOESM1_ESM.pdf]

## Extra Supplementary Materials for *Tsereteli et al.*

### ESM Methods

**Supplementary R codes for linear mixed-model hypothesis tests** (marginal terms are noted in interaction models for the sake of clarity, although R does not require these to be explicitly stated within models)

```
##### SPT regular #####
model_spt <- lmer(meal_iauc_sqrt ~ spt + meal + sex + age + bmi +
zygosity + weekend + season + (1|family_id/username), data = data)

# With SPT x meal interaction term
model_spt_int <- lmer(meal_iauc_sqrt ~ spt×Meal + spt + meal + sex +
age + bmi + zygosity + weekend + season + (1|family_id/username), data
= data)

##### SPT person-centered #####
model_spt_person <- lmer(meal_iauc_sqrt ~ spt_personcentered + meal +
sex + age + bmi + zygosity + weekend + season + (1|family_id/username),
data = data)

With SPT-person x meal interaction term
model_spt_person_int <- lmer(meal_iauc_sqrt ~ spt_personcentered×Meal +
spt_personcentered + Meal + sex + age + bmi + zygosity + weekend +
season + (1|family_id/username), data = data)

##### SE regular #####
model_se <- lmer(meal_iauc_sqrt ~ se + meal + sex + age + bmi +
zygosity + weekend + season+ (1|family_id/username), data = data)

# With interaction term
model_se_int <- lmer(meal_iauc_sqrt ~ se×Meal + se + Meal + sex + age +
bmi + zygosity + weekend + season+ (1|family_id/username), data = data)

##### SE person-centered #####
model_se_person <- lmer(meal_iauc_sqrt ~ se_personcentered + meal + sex
+ age + bmi + zygosity + weekend + season + (1|family_id/username),
data = data)

# With interaction
model_se_person_int <- lmer(meal_iauc_sqrt ~ se_personcentered×Meal +
se_personcentered + Meal + sex + age + bmi + zygosity + weekend +
season + (1|family_id/username), data = data)

##### Sleep midpoint #####
model_times <- lmer(meal_iauc_sqrt ~ sleepmidpoint_hr + spt + meal +
sex + age + bmi + zygosity + weekend + season+ (1|family_id/username),
data = data)

# With interaction
model_times_int <- lmer(meal_iauc_sqrt ~ sleepmidpoint_hr×Meal +
sleepmidpoint_hr + Meal + spt + sex + age + bmi + zygosity + weekend +
season+ (1|family_id/username), data = data)
```

## ESM Tables

**Supplementary Table 1.** Between-person sleep period time and postprandial glucose

| <i>Predictors</i>                                       | <b>Model without interaction</b> |                |          | <b>Model with interaction</b> |                |          |
|---------------------------------------------------------|----------------------------------|----------------|----------|-------------------------------|----------------|----------|
|                                                         | <i>Estimates</i>                 | <i>CI</i>      | <i>p</i> | <i>Estimates</i>              | <i>CI</i>      | <i>p</i> |
| (Intercept)                                             | 81.95                            | 73.74, 90.15   | <0.001   | 78.44                         | 69.18, 87.70   | <0.001   |
| SPT                                                     | -0.15                            | -0.48, 0.18    | 0.376    | 0.31                          | -0.33, 0.95    | 0.343    |
| Meal [High Carb]                                        | -15.97                           | -17.28, -14.66 | <0.001   | -7.62                         | -14.83, -0.42  | 0.038    |
| Meal [High Fat 35g]                                     | -42.54                           | -45.50, -39.58 | <0.001   | -38.94                        | -54.59, -23.30 | <0.001   |
| Meal [High Fat 40g]                                     | -50.06                           | -51.46, -48.66 | <0.001   | -41.73                        | -49.42, -34.03 | <0.001   |
| Meal [High Fibre]                                       | -21.21                           | -22.84, -19.58 | <0.001   | -20.30                        | -29.26, -11.34 | <0.001   |
| Meal [High Protein]                                     | -49.55                           | -51.10, -48.00 | <0.001   | -44.57                        | -52.65, -36.49 | <0.001   |
| Meal [MCM at home]                                      | -36.62                           | -38.74, -34.50 | <0.001   | -30.37                        | -42.51, -18.22 | <0.001   |
| Meal [Medium fat/carb]                                  | -27.92                           | -29.22, -26.63 | <0.001   | -29.06                        | -36.18, -21.95 | <0.001   |
| SPT × Meal [High Carb]                                  |                                  |                |          | -1.10                         | -2.03, -0.17   | 0.021    |
| SPT × Meal [High Fat 35g]                               |                                  |                |          | -0.47                         | -2.49, 1.54    | 0.645    |
| SPT × Meal [High Fat 40g]                               |                                  |                |          | -1.07                         | -2.05, -0.10   | 0.031    |
| SPT × Meal [High Fibre]                                 |                                  |                |          | -0.11                         | -1.27, 1.04    | 0.847    |
| SPT × Meal [High Protein]                               |                                  |                |          | -0.65                         | -1.68, 0.39    | 0.221    |
| SPT × Meal [MCM at home]                                |                                  |                |          | -0.82                         | -2.39, 0.76    | 0.309    |
| SPT × Meal [Medium fat/carb]                            |                                  |                |          | 0.16                          | -0.76, 1.07    | 0.737    |
| Random Effects                                          |                                  |                |          |                               |                |          |
| ICC                                                     | 0.45                             |                |          | 0.45                          |                |          |
| N                                                       | 953 <small>username</small>      |                |          | 953 <small>username</small>   |                |          |
|                                                         | 765 <small>family_id</small>     |                |          | 765 <small>family_id</small>  |                |          |
| Observations ( <i>n</i> meals)                          | 8395                             |                |          | 8395                          |                |          |
| Marginal R <sup>2</sup> /<br>Conditional R <sup>2</sup> | 0.363 / 0.651                    |                |          | 0.363 / 0.652                 |                |          |

SPT, sleep period time; MCM, metabolic challenge meal

**Supplementary Table 2.** Within-person sleep period time and postprandial glucose

| <i>Predictors</i>                                    | <b>Model without interaction</b> |                |          | <b>Model with interaction</b> |                |          |
|------------------------------------------------------|----------------------------------|----------------|----------|-------------------------------|----------------|----------|
|                                                      | <i>Estimates</i>                 | <i>CI</i>      | <i>p</i> | <i>Estimates</i>              | <i>CI</i>      | <i>p</i> |
| (Intercept)                                          | 80.62                            | 72.98, 88.26   | <0.001   | 80.62                         | 72.97, 88.26   | <0.001   |
| SPT-person                                           | -0.15                            | -0.48, 0.19    | 0.396    | 0.70                          | -0.05, 1.46    | 0.069    |
| Meal [High Carb]                                     | -15.97                           | -17.28, -14.66 | <0.001   | -16.15                        | -17.47, -14.84 | <0.001   |
| Meal [High Fat 35g]                                  | -42.54                           | -45.50, -39.58 | <0.001   | -42.57                        | -45.53, -39.62 | <0.001   |
| Meal [High Fat 40g]                                  | -50.06                           | -51.47, -48.66 | <0.001   | -50.03                        | -51.43, -48.62 | <0.001   |
| Meal [High Fibre]                                    | -21.21                           | -22.84, -19.58 | <0.001   | -21.18                        | -22.82, -19.55 | <0.001   |
| Meal [High Protein]                                  | -49.55                           | -51.10, -48.00 | <0.001   | -49.57                        | -51.12, -48.01 | <0.001   |
| Meal [MCM at home]                                   | -36.62                           | -38.74, -34.50 | <0.001   | -36.62                        | -38.75, -34.48 | <0.001   |
| Meal [Medium fat/carb]                               | -27.92                           | -29.22, -26.63 | <0.001   | -27.89                        | -29.19, -26.60 | <0.001   |
| SPT-person × Meal [High Carb]                        |                                  |                |          | -1.84                         | -2.96, -0.72   | 0.001    |
| SPT-person × Meal [High Fat 35g]                     |                                  |                |          | -0.81                         | -3.28, 1.66    | 0.520    |
| SPT-person × Meal [High Fat 40g]                     |                                  |                |          | -1.36                         | -2.49, -0.22   | 0.019    |
| SPT-person × Meal [High Fibre]                       |                                  |                |          | -0.44                         | -1.81, 0.93    | 0.531    |
| SPT-person × Meal [High Protein]                     |                                  |                |          | -0.98                         | -2.24, 0.27    | 0.123    |
| SPT-person × Meal [MCM at home]                      |                                  |                |          | -0.82                         | -2.78, 1.15    | 0.415    |
| SPT-person × Meal [Medium fat/carb]                  |                                  |                |          | -0.53                         | -1.64, 0.58    | 0.351    |
| <b>Random Effects</b>                                |                                  |                |          |                               |                |          |
| ICC                                                  | 0.45                             |                |          | 0.45                          |                |          |
| N                                                    | 953 <small>username</small>      |                |          | 953 <small>username</small>   |                |          |
|                                                      | 765 <small>family id</small>     |                |          | 765 <small>family id</small>  |                |          |
| Observations ( <i>n</i> meals)                       | 8395                             |                |          | 8395                          |                |          |
| Marginal R <sup>2</sup> / Conditional R <sup>2</sup> | 0.363 / 0.651                    |                |          | 0.363 / 0.652                 |                |          |

SPT-person, person-centered sleep period time; MCM, metabolic challenge meal

**Supplementary Table 3.** Between-person sleep efficiency and postprandial glucose

| <i>Predictors</i>                                    | <b>Model without interaction</b> |                |          | <b>Model with interaction</b> |                 |          |
|------------------------------------------------------|----------------------------------|----------------|----------|-------------------------------|-----------------|----------|
|                                                      | <i>Estimates</i>                 | <i>CI</i>      | <i>p</i> | <i>Estimates</i>              | <i>CI</i>       | <i>p</i> |
| (Intercept)                                          | 90.95                            | 79.81, 102.10  | <0.001   | 98.68                         | 81.61, 115.75   | <0.001   |
| SE                                                   | -10.48                           | -19.85, -1.11  | 0.028    | -19.18                        | -36.46, -1.91   | 0.030    |
| Meal [High Carb]                                     | -15.92                           | -17.23, -14.61 | <0.001   | -25.93                        | -46.60, -5.26   | 0.014    |
| Meal [High Fat 35g]                                  | -42.50                           | -45.45, -39.54 | <0.001   | -65.39                        | -113.50, -17.28 | 0.008    |
| Meal [High Fat 40g]                                  | -49.99                           | -51.40, -48.59 | <0.001   | -69.55                        | -92.12, -46.97  | <0.001   |
| Meal [High Fibre]                                    | -21.18                           | -22.81, -19.55 | <0.001   | -29.48                        | -55.23, -3.73   | 0.025    |
| Meal [High Protein]                                  | -49.51                           | -51.06, -47.96 | <0.001   | -61.18                        | -85.50, -36.86  | <0.001   |
| Meal [MCM at home]                                   | -36.49                           | -38.61, -34.37 | <0.001   | -36.18                        | -70.31, -2.06   | 0.038    |
| Meal [Medium fat/carb]                               | -27.88                           | -29.18, -26.59 | <0.001   | -30.94                        | -51.20, -10.67  | 0.003    |
| SE × Meal [High Carb]                                |                                  |                |          | 11.22                         | -11.90, 34.35   | 0.341    |
| SE × Meal [High Fat 35g]                             |                                  |                |          | 25.58                         | -28.06, 79.21   | 0.350    |
| SE × Meal [High Fat 40g]                             |                                  |                |          | 21.83                         | -3.32, 46.99    | 0.089    |
| SE × Meal [High Fibre]                               |                                  |                |          | 9.31                          | -19.51, 38.12   | 0.527    |
| SE × Meal [High Protein]                             |                                  |                |          | 13.10                         | -14.12, 40.31   | 0.346    |
| SE × Meal [MCM at home]                              |                                  |                |          | -0.25                         | -38.13, 37.63   | 0.990    |
| SE × Meal [Medium fat/carb]                          |                                  |                |          | 3.43                          | -19.25, 26.11   | 0.767    |
| <b>Random Effects</b>                                |                                  |                |          |                               |                 |          |
| ICC                                                  | 0.45                             |                |          | 0.45                          |                 |          |
| N                                                    | 953 <small>username</small>      |                |          | 953 <small>username</small>   |                 |          |
|                                                      | 765 <small>family_id</small>     |                |          | 765 <small>family_id</small>  |                 |          |
| Observations ( <i>n</i> meals)                       | 8395                             |                |          | 8395                          |                 |          |
| Marginal R <sup>2</sup> / Conditional R <sup>2</sup> | 0.363 / 0.652                    |                |          | 0.363 / 0.651                 |                 |          |

SE, sleep efficiency; MCM, metabolic challenge meal

**Supplementary Table 4.** Within-person sleep efficiency and postprandial glucose

| <i>Predictors</i>                                    | <b>Model without interaction</b> |                |          | <b>Model with interaction</b> |                |          |
|------------------------------------------------------|----------------------------------|----------------|----------|-------------------------------|----------------|----------|
|                                                      | <i>Estimates</i>                 | <i>CI</i>      | <i>p</i> | <i>Estimates</i>              | <i>CI</i>      | <i>p</i> |
| (Intercept)                                          | 81.83                            | 74.16, 89.50   | <0.001   | 81.92                         | 74.25, 89.58   | <0.001   |
| SE-person                                            | -11.93                           | -21.83, -2.04  | 0.018    | -29.75                        | -52.29, -7.21  | 0.010    |
| Meal [High Carb]                                     | -15.92                           | -17.22, -14.61 | <0.001   | -15.90                        | -17.21, -14.59 | <0.001   |
| Meal [High Fat 35g]                                  | -42.49                           | -45.45, -39.54 | <0.001   | -42.51                        | -45.47, -39.55 | <0.001   |
| Meal [High Fat 40g]                                  | -49.98                           | -51.38, -48.57 | <0.001   | -50.07                        | -51.48, -48.65 | <0.001   |
| Meal [High Fibre]                                    | -21.18                           | -22.81, -19.55 | <0.001   | -21.16                        | -22.79, -19.53 | <0.001   |
| Meal [High Protein]                                  | -49.51                           | -51.06, -47.95 | <0.001   | -49.47                        | -51.02, -47.92 | <0.001   |
| Meal [MCM at home]                                   | -36.48                           | -38.60, -34.36 | <0.001   | -36.35                        | -38.50, -34.20 | <0.001   |
| Meal [Medium fat/carb]                               | -27.88                           | -29.17, -26.59 | <0.001   | -27.86                        | -29.15, -26.56 | <0.001   |
| SE-person × Meal [High Carb]                         |                                  |                |          | 9.17                          | -23.31, 41.66  | 0.580    |
| SE-person × Meal [High Fat 35g]                      |                                  |                |          | 27.38                         | -44.92, 99.67  | 0.458    |
| SE-person × Meal [High Fat 40g]                      |                                  |                |          | 36.81                         | 1.32, 72.30    | 0.042    |
| SE-person × Meal [High Fibre]                        |                                  |                |          | 17.37                         | -23.12, 57.85  | 0.400    |
| SE-person × Meal [High Protein]                      |                                  |                |          | 48.23                         | 10.38, 86.09   | 0.013    |
| SE-person × Meal [MCM at home]                       |                                  |                |          | 0.52                          | -56.04, 57.09  | 0.986    |
| SE-person × Meal [Medium fat/carb]                   |                                  |                |          | 16.14                         | -16.41, 48.70  | 0.331    |
| <b>Random Effects</b>                                |                                  |                |          |                               |                |          |
| ICC                                                  | 0.45                             |                |          | 0.45                          |                |          |
| N                                                    | 953 <small>username</small>      |                |          | 953 <small>username</small>   |                |          |
|                                                      | 765 <small>family_id</small>     |                |          | 765 <small>family_id</small>  |                |          |
| Observations ( <i>n</i> meals)                       | 8395                             |                |          | 8395                          |                |          |
| Marginal R <sup>2</sup> / Conditional R <sup>2</sup> | 0.363 / 0.651                    |                |          | 0.364 / 0.651                 |                |          |

SE-person, person-centered sleep efficiency; MCM, metabolic challenge meal

| <i>Predictors</i>                                       | <b>Model without interaction</b> |                |          | <b>Model with interaction</b> |                |          |
|---------------------------------------------------------|----------------------------------|----------------|----------|-------------------------------|----------------|----------|
|                                                         | <i>Estimates</i>                 | <i>CI</i>      | <i>p</i> | <i>Estimates</i>              | <i>CI</i>      | <i>p</i> |
| (Intercept)                                             | 81.09                            | 72.57, 89.61   | <0.001   | 80.97                         | 72.44, 89.50   | <0.001   |
| Sleep onset <sup>a</sup>                                | 0.53                             | 0.05, 1.02     | 0.031    | 0.37                          | -0.41, 1.15    | 0.348    |
| Meal [High Carb]                                        | -15.92                           | -17.23, -14.60 | <0.001   | -15.70                        | -17.12, -14.28 | <0.001   |
| Meal [High Fat 35g]                                     | -42.42                           | -45.38, -39.46 | <0.001   | -42.35                        | -45.55, -39.14 | <0.001   |
| Meal [High Fat 40g]                                     | -49.98                           | -51.39, -48.58 | <0.001   | -49.84                        | -51.44, -48.23 | <0.001   |
| Meal [High Fibre]                                       | -21.20                           | -22.83, -19.57 | <0.001   | -21.53                        | -23.28, -19.78 | <0.001   |
| Meal [High Protein]                                     | -49.56                           | -51.11, -48.01 | <0.001   | -49.18                        | -50.83, -47.52 | <0.001   |
| Meal [MCM at home]                                      | -36.55                           | -38.67, -34.43 | <0.001   | -36.82                        | -39.26, -34.37 | <0.001   |
| Meal [Medium fat/carb]                                  | -27.90                           | -29.19, -26.60 | <0.001   | -27.76                        | -29.19, -26.34 | <0.001   |
| Sleep onset × Meal [High Carb]                          |                                  |                |          | 0.39                          | -0.59, 1.36    | 0.437    |
| Sleep onset × Meal [High Fat 35g]                       |                                  |                |          | 0.11                          | -2.00, 2.22    | 0.918    |
| Sleep onset × Meal [High Fat 40g]                       |                                  |                |          | 0.21                          | -0.83, 1.25    | 0.689    |
| Sleep onset × Meal [High Fibre]                         |                                  |                |          | -0.69                         | -1.87, 0.48    | 0.246    |
| Sleep onset × Meal [High Protein]                       |                                  |                |          | 0.77                          | -0.34, 1.88    | 0.173    |
| Sleep onset × Meal [MCM at home]                        |                                  |                |          | -0.31                         | -1.98, 1.36    | 0.716    |
| Sleep onset × Meal [Medium fat/carb]                    |                                  |                |          | 0.22                          | -0.77, 1.20    | 0.664    |
| <b>Random Effects</b>                                   |                                  |                |          |                               |                |          |
| ICC                                                     | 0.45                             |                |          | 0.45                          |                |          |
| N                                                       | 953 <small>username</small>      |                |          | 953 <small>username</small>   |                |          |
|                                                         | 765 <small>family_id</small>     |                |          | 765 <small>family_id</small>  |                |          |
| Observations ( <i>n</i> meals)                          | 8395                             |                |          | 8395                          |                |          |
| Marginal R <sup>2</sup> /<br>Conditional R <sup>2</sup> | 0.363 / 0.652                    |                |          | 0.363 / 0.652                 |                |          |

### Supplementary table 5. Between-person sleep onset and postprandial glucose

<sup>a</sup> Sleep onset is expressed in hours as a deviation from midnight  
MCM, metabolic challenge meal

**Supplementary Table 6. Between-person sleep offset and postprandial glucose**

| <i>Predictors</i>                                       | <b>Model without interaction</b> |                |          | <b>Model with interaction</b> |                |          |
|---------------------------------------------------------|----------------------------------|----------------|----------|-------------------------------|----------------|----------|
|                                                         | <i>Estimates</i>                 | <i>CI</i>      | <i>p</i> | <i>Estimates</i>              | <i>CI</i>      | <i>p</i> |
| (Intercept)                                             | 81.19                            | 72.67, 89.71   | <0.001   | 78.67                         | 69.22, 88.12   | <0.001   |
| Sleep offset <sup>a</sup>                               | 0.51                             | 0.02, 0.99     | 0.040    | 0.88                          | 0.12, 1.64     | 0.024    |
| Meal [High Carb]                                        | -15.92                           | -17.23, -14.60 | <0.001   | -9.88                         | -16.78, -2.99  | 0.005    |
| Meal [High Fat 35g]                                     | -42.42                           | -45.38, -39.46 | <0.001   | -39.49                        | -55.17, -23.81 | <0.001   |
| Meal [High Fat 40g]                                     | -49.99                           | -51.39, -48.58 | <0.001   | -42.67                        | -50.21, -35.14 | <0.001   |
| Meal [High Fibre]                                       | -21.20                           | -22.82, -19.57 | <0.001   | -14.85                        | -23.44, -6.27  | 0.001    |
| Meal [High Protein]                                     | -49.56                           | -51.11, -48.00 | <0.001   | -49.47                        | -57.25, -41.69 | <0.001   |
| Meal [MCM at home]                                      | -36.55                           | -38.67, -34.43 | <0.001   | -27.55                        | -39.94, -15.16 | <0.001   |
| Meal [Medium fat/carb]                                  | -27.90                           | -29.19, -26.60 | <0.001   | -30.11                        | -36.91, -23.30 | <0.001   |
| Sleep offset × Meal [High Carb]                         |                                  |                |          | -0.86                         | -1.82, 0.10    | 0.081    |
| Sleep offset × Meal [High Fat 35g]                      |                                  |                |          | -0.41                         | -2.60, 1.77    | 0.710    |
| Sleep offset × Meal [High Fat 40g]                      |                                  |                |          | -1.04                         | -2.10, 0.01    | 0.053    |
| Sleep offset × Meal [High Fibre]                        |                                  |                |          | -0.89                         | -2.08, 0.29    | 0.140    |
| Sleep offset × Meal [High Protein]                      |                                  |                |          | -0.01                         | -1.08, 1.05    | 0.979    |
| Sleep offset × Meal [MCM at home]                       |                                  |                |          | -1.31                         | -3.08, 0.47    | 0.151    |
| Sleep offset × Meal [Medium fat/carb]                   |                                  |                |          | 0.32                          | -0.63, 1.27    | 0.505    |
| <b>Random Effects</b>                                   |                                  |                |          |                               |                |          |
| ICC                                                     | 0.45                             |                |          | 0.45                          |                |          |
| N                                                       | 953 <small>username</small>      |                |          | 953 <small>username</small>   |                |          |
|                                                         | 765 <small>family_id</small>     |                |          | 765 <small>family_id</small>  |                |          |
| Observations ( <i>n</i> meals)                          | 8395                             |                |          | 8395                          |                |          |
| Marginal R <sup>2</sup> /<br>Conditional R <sup>2</sup> | 0.363 / 0.652                    |                |          | 0.364 / 0.652                 |                |          |

<sup>a</sup> Sleep offset is expressed in hours as a deviation from midnight  
MCM, metabolic challenge meal

**Supplementary Table 7. Between-person sleep offset and onset and postprandial glucose**

| <i>Predictors</i>                                       | <b>Model without interaction</b> |                |          | <b>Model with interaction</b> |                |          |
|---------------------------------------------------------|----------------------------------|----------------|----------|-------------------------------|----------------|----------|
|                                                         | <i>Estimates</i>                 | <i>CI</i>      | <i>p</i> | <i>Estimates</i>              | <i>CI</i>      | <i>p</i> |
| (Intercept)                                             | 81.24                            | 72.72, 89.76   | <0.001   | 78.71                         | 69.27, 88.16   | <0.001   |
| Sleep offset <sup>a</sup>                               | 0.11                             | -0.30, 0.52    | 0.600    | 0.47                          | -0.24, 1.19    | 0.194    |
| Sleep onset <sup>a</sup>                                | 0.41                             | 0.01, 0.81     | 0.047    | 0.42                          | 0.01, 0.82     | 0.042    |
| Meal [High Carb]                                        | -15.92                           | -17.23, -14.61 | <0.001   | -9.88                         | -16.78, -2.99  | 0.005    |
| Meal [High Fat 35g]                                     | -42.42                           | -45.38, -39.46 | <0.001   | -39.47                        | -55.15, -23.80 | <0.001   |
| Meal [High Fat 40g]                                     | -49.98                           | -51.39, -48.58 | <0.001   | -42.68                        | -50.21, -35.14 | <0.001   |
| Meal [High Fibre]                                       | -21.20                           | -22.83, -19.57 | <0.001   | -14.84                        | -23.42, -6.26  | 0.001    |
| Meal [High Protein]                                     | -49.56                           | -51.11, -48.01 | <0.001   | -49.46                        | -57.24, -41.68 | <0.001   |
| Meal [MCM at home]                                      | -36.55                           | -38.67, -34.44 | <0.001   | -27.55                        | -39.93, -15.16 | <0.001   |
| Meal [Medium fat/carb]                                  | -27.90                           | -29.19, -26.61 | <0.001   | -30.11                        | -36.92, -23.30 | <0.001   |
| Sleep offset × Meal [High Carb]                         |                                  |                |          | -0.86                         | -1.82, 0.10    | 0.081    |
| Sleep offset × Meal [High Fat 35g]                      |                                  |                |          | -0.42                         | -2.60, 1.77    | 0.709    |
| Sleep offset × Meal [High Fat 40g]                      |                                  |                |          | -1.04                         | -2.10, 0.01    | 0.053    |
| Sleep offset × Meal [High Fibre]                        |                                  |                |          | -0.90                         | -2.08, 0.29    | 0.139    |
| Sleep offset × Meal [High Protein]                      |                                  |                |          | -0.02                         | -1.09, 1.05    | 0.975    |
| Sleep offset × Meal [MCM at home]                       |                                  |                |          | -1.31                         | -3.09, 0.47    | 0.150    |
| Sleep offset × Meal [Medium fat/carb]                   |                                  |                |          | 0.32                          | -0.63, 1.27    | 0.505    |
| <b>Random Effects</b>                                   |                                  |                |          |                               |                |          |
| ICC                                                     | 0.45                             |                |          | 0.45                          |                |          |
| N                                                       | 953 <small>username</small>      |                |          | 953 <small>username</small>   |                |          |
|                                                         | 765 <small>family_id</small>     |                |          | 765 <small>family_id</small>  |                |          |
| Observations                                            | 8395                             |                |          | 8395                          |                |          |
| Marginal R <sup>2</sup> /<br>Conditional R <sup>2</sup> | 0.363 / 0.652                    |                |          | 0.364 / 0.652                 |                |          |

<sup>a</sup> Sleep offset and onset are expressed in hours as a deviation from midnight  
MCM, metabolic challenge meal



## ESM Figure

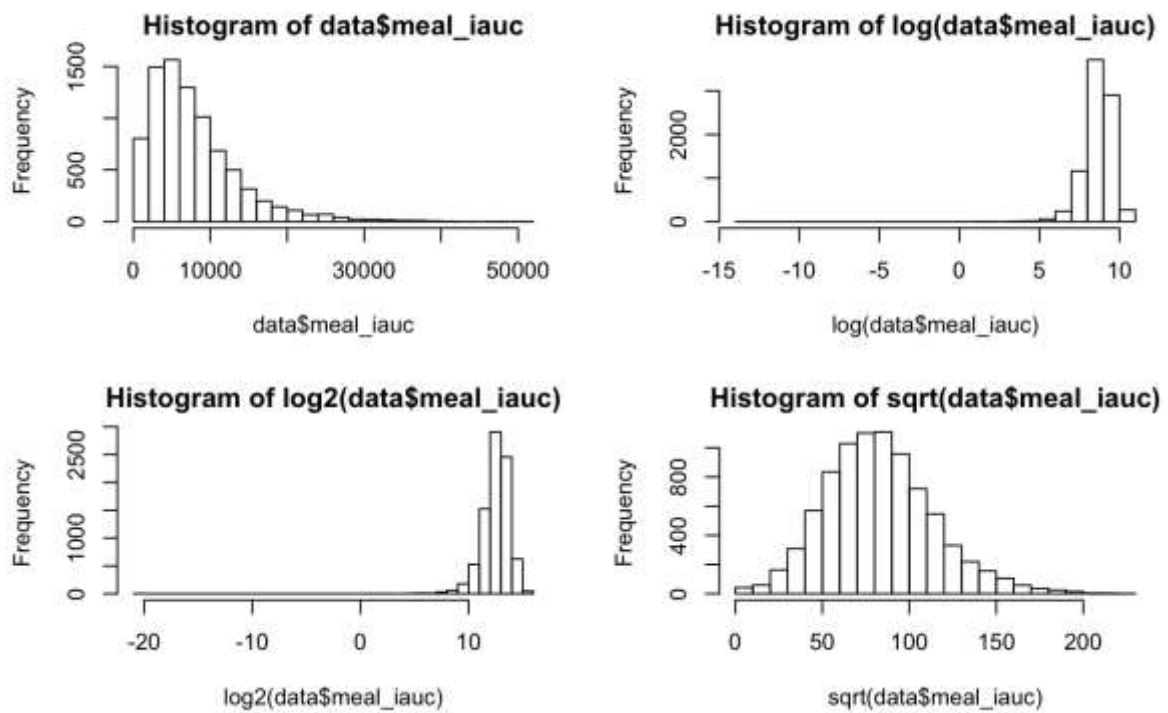

**Supplementary Figure 1.** Histograms of glucose<sub>iAUC0-2h</sub>. From left to right: 1) Raw, 2) Natural log transformed, 3) Base 2 log transformed, 4) Square root transformed.
